# Supplementary material for: Self-organized patterning through the dynamic segregation of DNA and silica nanoparticles
Source: PubMed Central journal article supplement — Sci Rep. 2014 Jan 13;4:3660. doi: 10.1038/srep03660 (PMC3888975; doi:10.1038/srep03660), 2014-01-13
Supplement: srep03660-s1.pdf [file srep03660-s1.pdf]

# Self-organized patterning through dynamic segregation between DNA and silica nanoparticles

Rastko Joksimovic<sup>a,b</sup>, Shun Watanabe<sup>c</sup>, Sven Riemer<sup>a</sup>,  
Michael Gradzielski<sup>a</sup>, Kenichi Yoshikawa<sup>c\*</sup>

<sup>a</sup>Technische Universität Berlin, Institut für Chemie, Strasse des 17. Juni 124, Sekr. TC7, D-10963 Berlin, Germany

<sup>b</sup>WPI-AIMR, Tohoku University, 2-1-1 Katahira, Aoba-ku, Sendai 980-8577, Japan

<sup>c</sup>Faculty of Life and Medical Sciences, Doshisha University, Miyakodani, Kyotanabe, Kyoto 610-0394, Japan

\*Corresponding author: keyoshik@mail.doshisha.ac.jp (Kenichi Yoshikawa)

## Additional experimental results

### Polarization microscopy

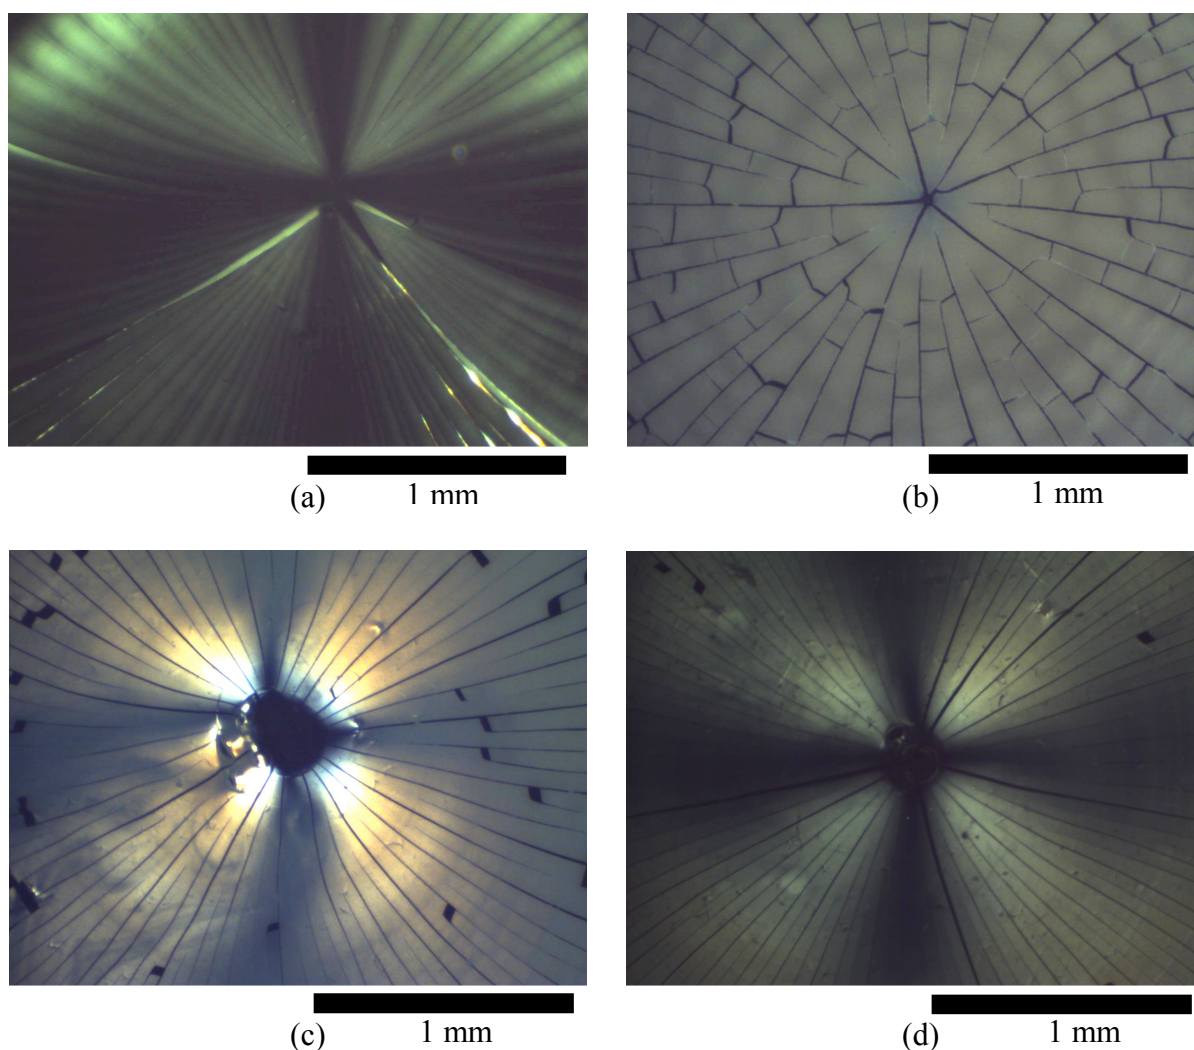

Fig 1. Polarization microscopy (PM) images obtained after the drying of droplets containing (a) nanoparticles only (7.8 % wt.) and nanoparticles (NP) with DNA at different concentrations corresponding to different NP/dsDNA ratios: (b) 1 : 0.5, (c) 1 : 0.25, and (d) 1 : 0.167. The ratio of 1 : 0.5 corresponds to a DNA at  $20.8 \text{ mg}\cdot\text{L}^{-1}$ . The scale bar is 1 mm.

## Transmission electron microscopy

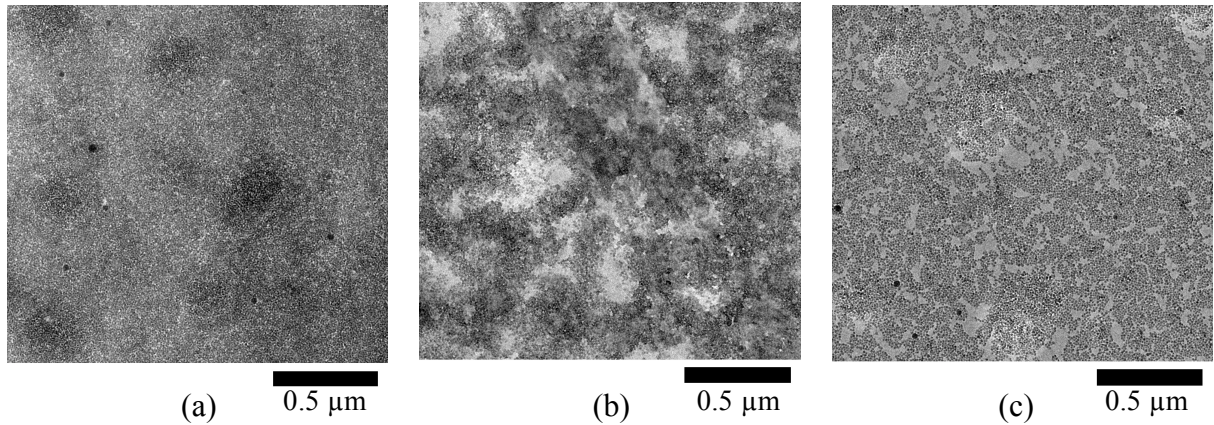

Fig 2. TEM images of the silica nanoparticles from a solution (a) without DNA and containing DNA at the NP/dsDNA ratios of (b) 1 : 0.5 and (c) 1 : 0.25. The radius of the nanoparticles is around 5 nm. The scale bar is 0.5  $\mu\text{m}$ .

## Scanning electron microscopy

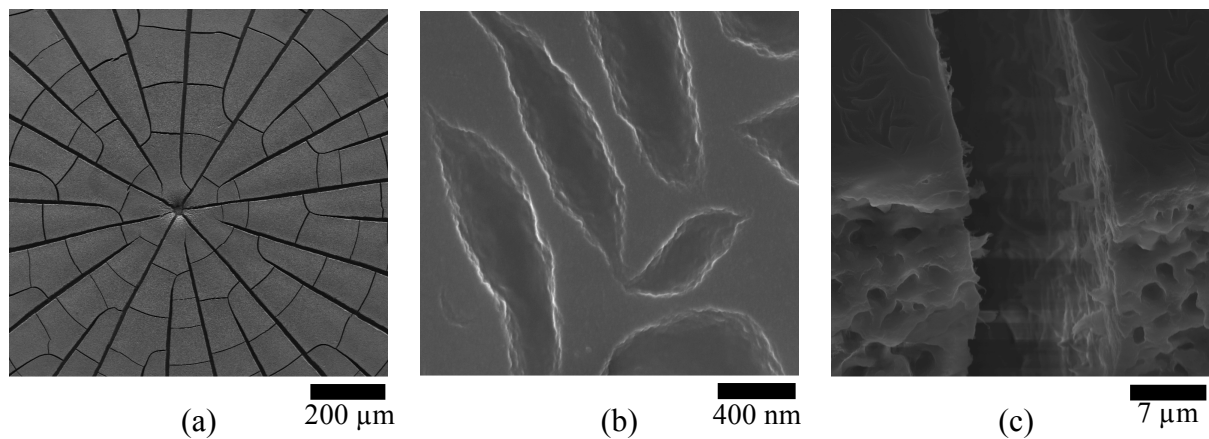

Fig 3. HR-SEM images of the dried droplets for the NP/dsDNA ratio of 1 : 0.5. The scale bar is (a) 200  $\mu\text{m}$ , (b) 400 nm, and (c) 7  $\mu\text{m}$ .

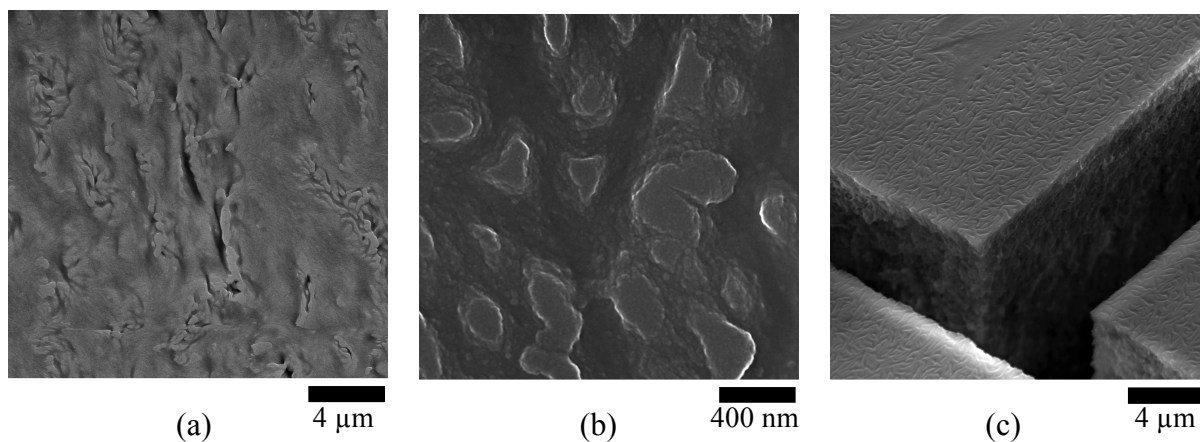

Fig 4. HR-SEM images of the dried droplets for the NP/dsDNA ratio of 1 : 0.25. The scale bar is (a) 4  $\mu\text{m}$ , (b) 400 nm, and (c) 4  $\mu\text{m}$ .

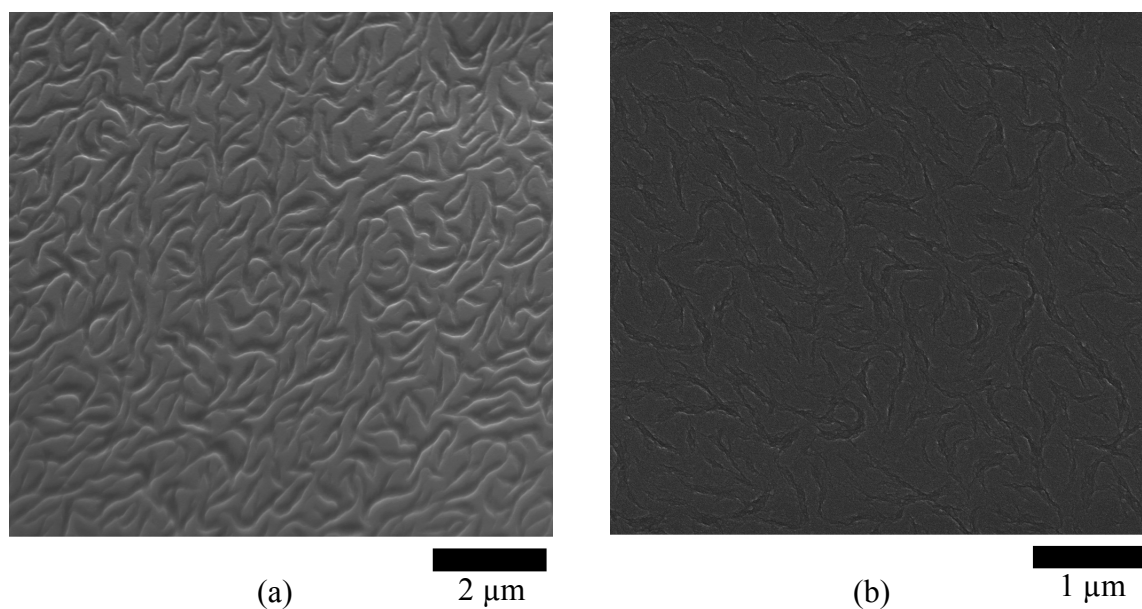

Fig 5. HR-SEM image of the dried droplet for the NP/dsDNA ratios of (a) 1 : 0.167 and (b) 1 : 0.125. The scale bar is 2  $\mu\text{m}$  and 1  $\mu\text{m}$  respectively.

## Fluorescence microscopy

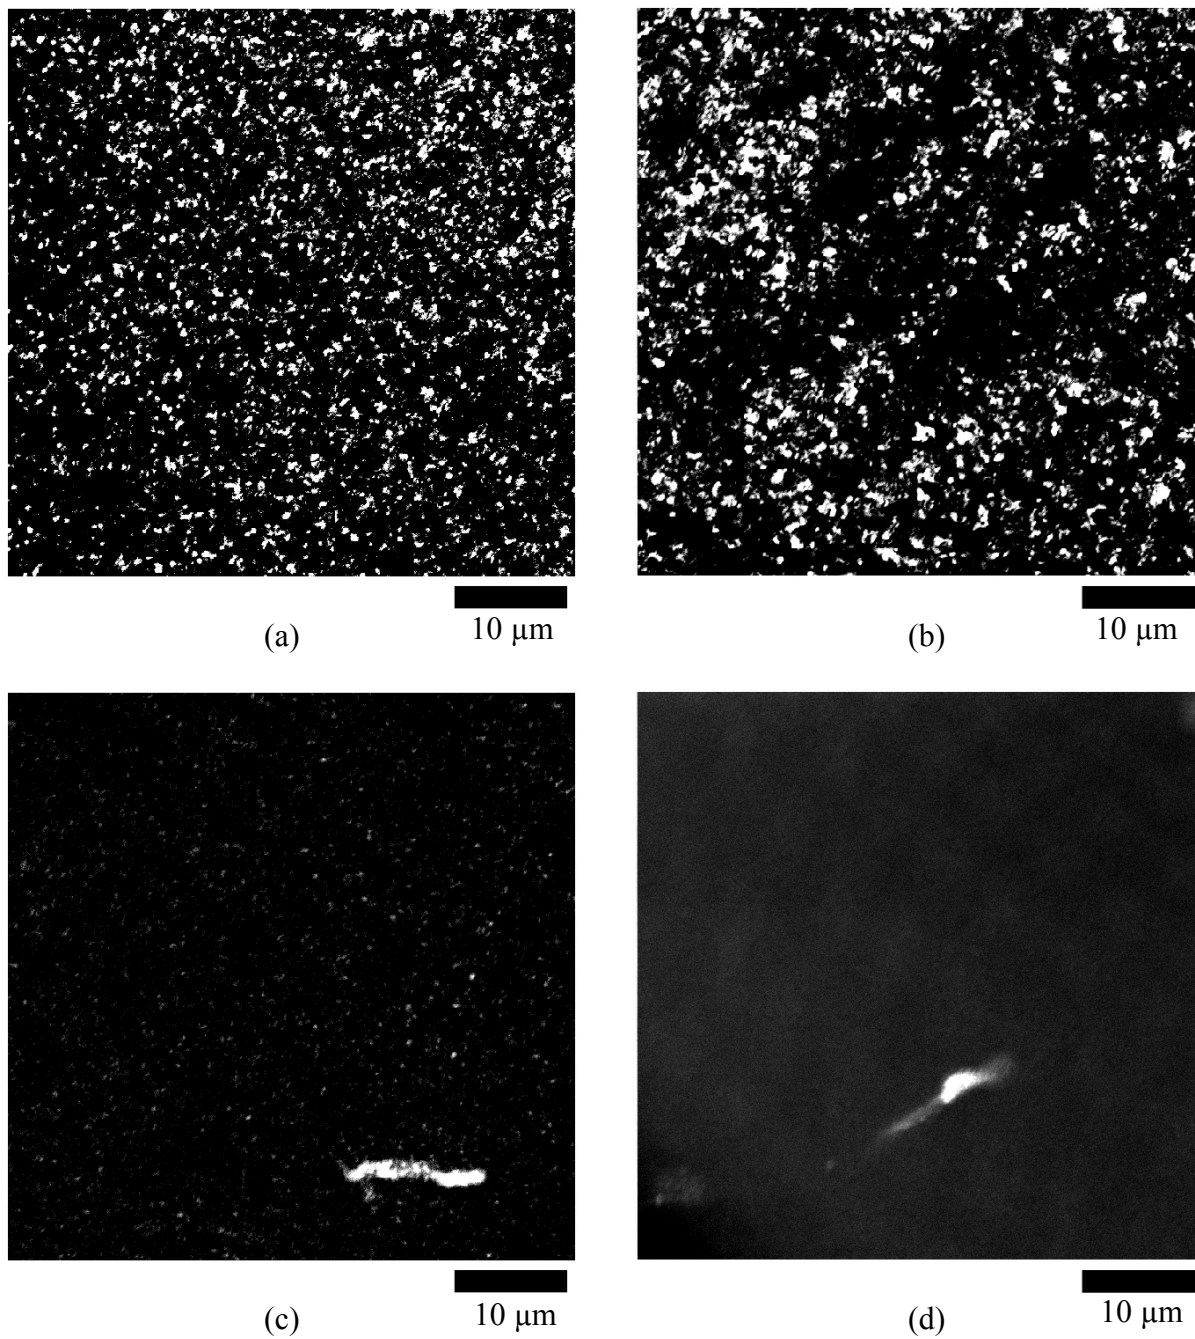

Fig 7. Fluorescence microscopy images obtained by staining DNA with the dye YOYO-I for the NP/dsDNA ratios (a) 1 : 0.75, (b) 1 : 0.5, (c) 1 : 0.25, and (d) 1 : 0.167
